# Supplementary material
Source: PubMed Central journal article supplement (PMC2553603)
Supplement: tpc.108.060582_1.pdf [file tpc.108.060582_1.pdf]

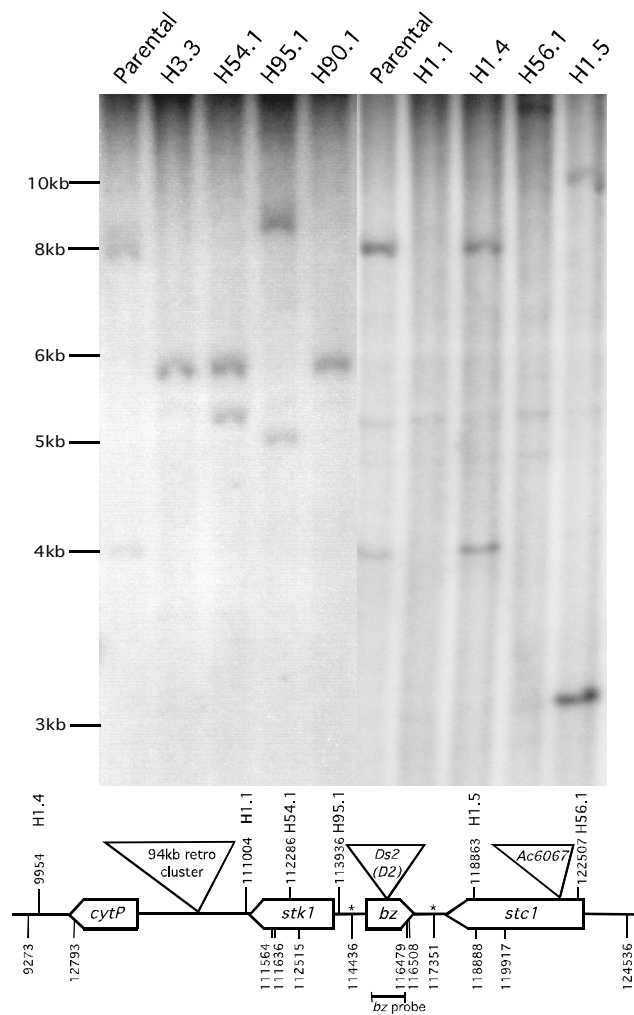

**Supplemental Figure 1.** DNA gel blot analysis of *bz-s* derivatives (PstI digest; *bz* probe).

PstI digests of genomic DNAs from *bz-m2(D2) Ac6067* and *bz-s* derivatives H1.1, H1.4, H1.5, H3.3, H54.1, H56.1, H90.1 and H95.1 were hybridized to a *bz* probe. The positions of the *bz* fragment used as probe and the location of the PstI sites in the 226-kb McC *bz* haplotype contig (GenBank AF391808) are shown below the map; the asterisks represent PstI sites known to be methylated in genomic DNA. The location of the inferred *e-f* transposition target site in each *bz-s* derivative is shown above the map.

The following bands are detected by the *bz* probe. Parental: 7.7 and 4.0 kb, *Ds* occupied and somatic xis sites respectively; H3.3, MTn transposition to unmapped 9S location: 5.6 kb, MTn xis site; H54.1, MTn transposition to *stk1* exon 3: 5.0 and 1.3 kb (not shown), transposed MTn with *Ds* (germinal) and without *Ds* (somatic xis), respectively, and 5.6 kb, MTn xis site; H95.1, MTn transposition in reverse orientation to *stk1* 5' UTR: 8.5 and 4.8 kb, transposed MTn with *Ds* (germinal) and without *Ds* (somatic xis), respectively (the MTn xis site and the transposed MTn are in the same PstI fragment); H90.1, MTn xis: 5.6 kb, MTn xis site; H1.1, 4.8-kb adjacent inversion: 9.2 and 5.5 kb, inversion with *Ds* (germinal) and without *Ds* (somatic xis), respectively; H1.4, 106-kb adjacent inversion: 7.7 and 4.0 kb, inversion with *Ds* (germinal) and without *Ds* (somatic xis), respectively; H56.2, 0.2-kb adjacent inversion on the *Ac* side: 12.7 kb, inversion with *Ac* and *Ds*; H1.5, ITS rearrangement: 9.4 kb, rearrangement with *Ds* and 3.1 kb, rearranged *stc1* fragment from the middle of ITS.

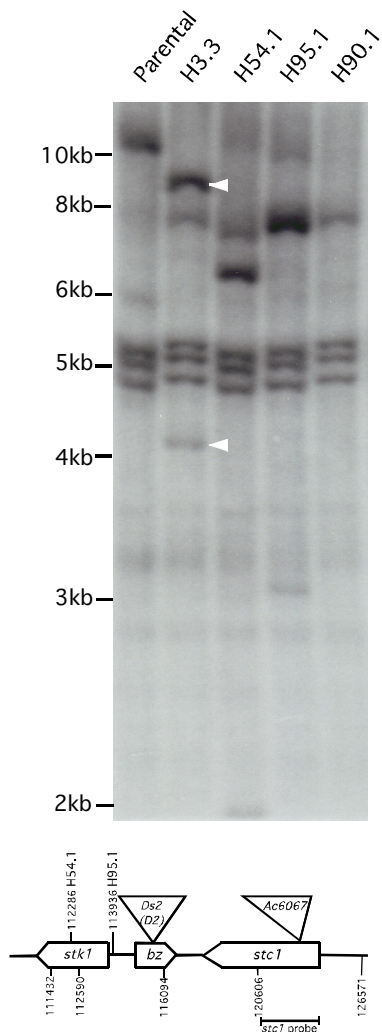

**Supplemental Figure 2.** DNA gel blot analysis of *bz-s* derivatives (*SacI* digest; *stc1* probe).

*SacI* digests of genomic DNAs from *bz-m2(D2) Ac6067* and *bz-s* derivatives H3.3, H54.1, H95.1 and H90.1, which carry transposed MTNs, were hybridized to an *stc1* probe. The position of the *stc1* fragment used as probe and the location of the *SacI* sites in the 226-kb *McC bz* haplotype contig (GenBank AF391808) are shown below the map.

The following bands are detected by the *stc1* probe. Parental: 10.5 and 6 kb, *Ac* occupied and somatic *xis* sites respectively; H3.3, MTn transposition to unmapped 9S location: 9.0 and 4.1 kb (white arrowheads), transposed MTn with *Ac* (germinal) and without *Ac* (somatic *xis*), respectively, and 7.5 kb, MTn *xis* site; H54.1, MTn transposition to *stc1* exon 3: 6.6 and 2 kb, transposed MTn with *Ac* (germinal) and without *Ac* (somatic *xis*), respectively, and 7.5 kb, MTn *xis* site; H95.1, MTn transposition in reverse orientation to *stc1* 5' UTR: 7.6 and 3 kb transposed MTn with *Ac* (germinal) and without *Ac* (somatic *xis*), respectively, and 10.1 kb, MTn *xis* site with *Ds*; H90.1 (MTn *xis*): 7.5 kb, MTn *xis* site.

**Supplemental Table 1.** Sequence of excision footprints and new TE junctions in bz-s derivatives

| Class | Category                              | bz-s derivative | Figure 2 | <i>xis</i> footprint                | New <i>Ds</i> end junction <sup>1</sup>                       | New <i>Ac</i> end junction <sup>2</sup>                       |
|-------|---------------------------------------|-----------------|----------|-------------------------------------|---------------------------------------------------------------|---------------------------------------------------------------|
| 4     | <i>Ds</i> 5' adjacent deletion        | H1.6            | B        |                                     | GCCGGGCACGGGCTC--<br>CAGGGATGAAAGTAG                          |                                                               |
| 5     | <i>Ds</i> 3' adjacent del + <i>Ac</i> | H3.7            | C        |                                     | TTCATCCCTA--<br>CGCGTGTCTTGGTTAC                              |                                                               |
|       |                                       | H3.8            |          |                                     | TTCATCCCTA--<br>CCCTTGTTGCGGCCAT                              |                                                               |
|       |                                       | H3.10           |          |                                     | TTCATCCCTA--<br>GTATTAACAACATATGC                             |                                                               |
| 6     | <i>Ds</i> 3' adjacent del - <i>Ac</i> | H68.2           |          |                                     | TTTTTCATCCCTA--<br>CTACTAGCGGGGCGGC                           |                                                               |
|       |                                       | H98.1           |          |                                     | TTTTTCATCCCTA--<br>GGCGGCCCTGCTGGTG                           |                                                               |
| 7     | <i>Ac</i> 5' adjacent deletion        | H62.1           | D        |                                     |                                                               | GGAACCTGCGCTTCGT--<br>CAGGGATGAAAGT                           |
| 8     | Inversion, ITS deletion               | H1.1            | E        |                                     | AAACTCATGCTAGAAAC--<br>TAGGGATGAAAA                           | GGTGTTGTTTCTAG--<br>CAGGGATGAAAGT                             |
|       |                                       | H1.4            | F        |                                     | GTGGTGCTGGCGAT--<br>TAGGGATGAAAA                              | CATGCCAATCGCCAG--<br>CAGGGATGAAAGT                            |
|       |                                       | H56.1           | G        |                                     | TTTTTCATCCCTA--<br>AGCACGGTCCAGCGG                            | TACTTTCATCCCTG--<br>ACCGTGCTGCTAGC                            |
|       |                                       | H56.2           |          |                                     | TTTTTCATCCCTA--<br>AGCACGGTCCAGCGG                            | TACTTTCATCCCTG--<br>ACCGTGCTGCTAGC                            |
| 9     | MTn transposition                     | H3.3            |          | CACCGCATGGGGCAG--<br>TCTTTCGCCTGCC  | GGATGGGTATCATGAGTC--<br>CAGGGATGAAAG                          |                                                               |
|       |                                       | H54.1           | H        | CACCGCATGGGGCAG--<br>TCTTTCGCCTGCC  | ACCGGGCCTCGTGGG--<br>CAGGGATGAAAGTAG                          | CCGTTTTTCATCCCTA--<br>CTCGTGGGACATGCCG                        |
|       |                                       | H95.1           |          |                                     | CACCGCATGGGGCAG--<br>TCTTTCGCCTGCC                            | CTACTTTCATCCCTG--<br>GGCACGCCGGGAGGG                          |
| 10    | MTn excision                          | H34.1           |          | CACCGCATGGGGCA--<br>CTCTTTCGCCTGCC  |                                                               |                                                               |
|       |                                       | H40.1           |          | CACCGCATGGGGCA--<br>CTCTTTCGCCTGCC  |                                                               |                                                               |
|       |                                       | H70.1           |          | CACCGCATGGGGCAC--<br>CTTTCGCCTGCC   |                                                               |                                                               |
|       |                                       | H77.3           |          | CACCGCATGGGCAG--<br>TCTTTCGCCTGCC   |                                                               |                                                               |
|       |                                       | H85.1           |          | CACCGCATGGGGCACT--<br>TCTTTCGCCTGCC |                                                               |                                                               |
|       |                                       | H90.1           | I        | CACCGCATGGGGCA--<br>AGTCTTTCGCCTGCC |                                                               |                                                               |
|       |                                       | H90.2           |          |                                     | CACCGCATGGGGCA--<br>AGTCTTTCGCCTGCC                           |                                                               |
| 11    | ITS rearrangement                     | H57.3           |          | CGTCCTTTTC--<br>GGGGCAGTGCCTC       | GACCGTTTTTCATCCCTA--<br>ACCGACGCCACCCGGC                      | CCTCCAGCACCGACGC--<br>CAGGGATGAAAGT                           |
|       |                                       | H72.3           |          | CGTCCTTTTC--<br>AGGGCAGTGCCTC       | GACCGTTTTTCATCCCTA--<br>TGCGCCGGACGGAGG                       | GGGCGCACGTGCGCCGG--<br>CAGGGATGAAAGT                          |
|       |                                       | H75.1           |          | CGTCCTTTTC--<br>GGGGCAGTGCCTC       | GACCGTTTTTCATCCCTA--<br>ATGGATGGTACATCGAG                     | CTCGACAGGCATGGATGG--<br>CAGGGATGAAAGT                         |
|       |                                       | H87.1           |          | CGTCCTTTTC--<br>GGGGCAGTGCCTC       | GACCGTTTTTCATCCCTA--<br>GCAAGGGCCAAGGAGC                      | CGGATGAGGGCAAGGGC--<br>CAGGGATGAAAGT                          |
|       |                                       | H1.5            | J        | GGAGGCACTGCC--<br>CGAAAGAGGACGATG   | TTTTTCATCCCTA--<br>CTTGTCACCTCTTGT                            | TGGCCTTGTCACCT--<br>CAGGGATGAAAGT                             |
|       |                                       |                 |          |                                     |                                                               |                                                               |
| 14    | 3-ended <i>Ds</i> (two 3' ends)       | H81.1           |          |                                     | GTTTTTCATCCCTA--<br>GTAGCAAGTGGCTCCTCT                        |                                                               |
|       |                                       |                 |          |                                     | <sup>1</sup> <i>Ds</i> 5' end sequence in red; 3' end in blue | <sup>2</sup> <i>Ac</i> 5' end sequence in red; 3' end in blue |
|       |                                       |                 |          |                                     | <b>TSD</b> in bold                                            | <b>TSD</b> in bold                                            |

**Supplemental Table 2.** BFB activity of *bz-s* derivatives from *bz-m2(D2) Ac6067*

| <b>Class</b> | <b>Category</b>                        | <b>bz-s derivative</b> | <b># BFB kernels</b> | <b>Adjusted Total kernels<sup>1</sup></b> | <b>BFB Fraction</b> |
|--------------|----------------------------------------|------------------------|----------------------|-------------------------------------------|---------------------|
| 4            | <i>Ds</i> 5' adjacent deletion         | H3.17                  |                      |                                           | NT                  |
|              |                                        | H95.2                  | 47                   | 197                                       | 0.238               |
|              |                                        | H110.1                 |                      |                                           | NT                  |
| 5            | <i>Ds</i> 3' adjacent del. + <i>Ac</i> | H3.7                   | 355                  | 414                                       | 0.857               |
|              |                                        | H3.8                   | 373                  | 420                                       | 0.888               |
|              |                                        | H3.10                  | 150                  | 197                                       | 0.760               |
|              |                                        | H95.3                  | 135                  | 194                                       | 0.695               |
|              |                                        | H45.1                  |                      |                                           | NT                  |
|              |                                        | H69.1                  | 150                  | 158                                       | 0.947               |
|              |                                        | H73.1                  | 123                  | 135                                       | 0.910               |
| 6            | <i>Ds</i> 3' adjacent del. - <i>Ac</i> | H57.2                  | 0                    | 190                                       | 0.000               |
|              |                                        | H59.1                  | 0                    | 164                                       | 0.000               |
|              |                                        | H74.3                  | 0                    | 180                                       | 0.000               |
|              |                                        | H64.1                  | 1                    | 201                                       | 0.005               |
|              |                                        | H64.3                  | 0                    | 169                                       | 0.000               |
|              |                                        | H66.1                  | 0                    | 106                                       | 0.000               |
|              |                                        | H68.2                  |                      |                                           | NT                  |
|              |                                        | H77.6                  | 2                    | 148                                       | 0.014               |
|              |                                        | H85.3                  | 1                    | 148                                       | 0.007               |
|              |                                        | H98.1                  | 0                    | 158                                       | 0.000               |
| 7            | <i>Ac</i> 5' adjacent deletion         | H3.1                   |                      |                                           | NT                  |
|              |                                        | H3.11                  |                      |                                           | NT                  |
|              |                                        | H34.2                  |                      |                                           | NT                  |
|              |                                        | H34.3                  | 0                    | 180                                       | 0.000               |
|              |                                        | H34.4                  | 2                    | 158                                       | 0.013               |
|              |                                        | H39.1                  | 0                    | 4                                         | 0.000               |
|              |                                        | H43.1                  | 3                    | 201                                       | 0.015               |
|              |                                        | H49.3                  | 4                    | 190                                       | 0.021               |
|              |                                        | H57.4                  |                      |                                           | NT                  |
|              |                                        | H58.1                  |                      |                                           | NT                  |
|              |                                        | H98.2                  | 0                    | 127                                       | 0.000               |
|              |                                        | H81.2                  |                      |                                           | NT                  |
|              |                                        | H86.1                  | 0                    | 158                                       | 0.000               |
|              |                                        | H60.1                  | 0                    | 169                                       | 0.000               |
|              |                                        | H60.2                  | 2                    | 137                                       | 0.015               |
|              |                                        | H61.2                  | 9                    | 116                                       | 0.077               |
|              |                                        | H62.1                  | 10                   | 185                                       | 0.054               |
| H64.2        | 1                                      | 127                    | 0.008                |                                           |                     |
| H83.1        | 2                                      | 137                    | 0.015                |                                           |                     |
| H93.1        |                                        |                        | NT                   |                                           |                     |
| H96.1        | 3                                      | 201                    | 0.015                |                                           |                     |
| H99.1        | 1                                      | 275                    | 0.004                |                                           |                     |
| H105.1       | 0                                      | 53                     | 0.000                |                                           |                     |
| H112.1       | 3                                      | 127                    | 0.024                |                                           |                     |
| H114.1       | 2                                      | 153                    | 0.013                |                                           |                     |
| H85.2        | 1                                      | 169                    | 0.006                |                                           |                     |
| 8            | Inversion, ITS deletion                | H3.2                   | 0                    | 330                                       | 0.000               |
|              |                                        | H3.4                   | 0                    | 300                                       | 0.000               |
|              |                                        | H3.5                   | 376                  | 400                                       | 0.940               |
|              |                                        | H3.6                   | 120                  | 206                                       | 0.583               |

1 Adjusted for reduced transmission of *sh-bz-X2* homolog

**Supplemental Table 2.** BFB activity of *bz-s* derivatives from *bz-m2(D2) Ac6067*

| <b>Class</b> | <b>Category</b>   | <b>bz-s derivative</b> | <b># BFB kernels</b> | <b>Adjusted Total kernels<sup>1</sup></b> | <b>BFB Fraction</b> |
|--------------|-------------------|------------------------|----------------------|-------------------------------------------|---------------------|
|              |                   | H3.9                   | 0                    | 360                                       | 0.000               |
|              |                   | H3.12                  | 90                   | 340                                       | 0.265               |
|              |                   | H3.13                  | 26                   | 280                                       | 0.093               |
|              |                   | H40.2                  | 0                    | 116                                       | 0.000               |
|              |                   | H42.1                  | 0                    | 106                                       | 0.000               |
|              |                   | H43.2                  | 0                    | 106                                       | 0.000               |
|              |                   | H45.2                  | 1                    | 121                                       | 0.008               |
|              |                   | H48.1                  | 0                    | 232                                       | 0.000               |
|              |                   | H48.2                  | 0                    | 158                                       | 0.000               |
|              |                   | H48.3                  |                      |                                           | NT                  |
|              |                   | H49.1                  |                      |                                           | NT                  |
|              |                   | H49.2                  | 171                  | 197                                       | 0.866               |
|              |                   | H56.1                  | 194                  | 200                                       | 0.972               |
|              |                   | H56.2                  | 134                  | 143                                       | 0.940               |
|              |                   | H56.3                  |                      |                                           | NT                  |
|              |                   | H58.2                  |                      |                                           | NT                  |
|              |                   | H61.1                  | 11                   | 169                                       | 0.065               |
|              |                   | H61.3                  | 1                    | 158                                       | 0.006               |
|              |                   | H63.1                  | 42                   | 127                                       | 0.331               |
|              |                   | H63.2                  |                      |                                           | NT                  |
|              |                   | H68.1                  | 0                    | 53                                        | 0.000               |
|              |                   | H69.2                  | 64                   | 102                                       | 0.625               |
|              |                   | H72.1                  |                      |                                           | NT                  |
|              |                   | H72.2                  | 0                    | 180                                       | 0.000               |
|              |                   | H74.1                  | 130                  | 148                                       | 0.879               |
|              |                   | H74.2                  | 147                  | 154                                       | 0.953               |
|              |                   | H77.1                  | 0                    | 127                                       | 0.000               |
|              |                   | H77.5                  | 2                    | 253                                       | 0.008               |
|              |                   | H84.1                  | 198                  | 211                                       | 0.938               |
|              |                   | H92.1                  | 173                  | 199                                       | 0.871               |
|              |                   | H101.1                 | 82                   | 87                                        | 0.947               |
|              |                   | H102.1                 | 174                  | 184                                       | 0.947               |
|              |                   | H104.1                 | 4                    | 70                                        | 0.057               |
|              |                   | H107.1                 | 138                  | 162                                       | 0.854               |
|              |                   | H107.2                 | 0                    | 8                                         | 0.000               |
|              |                   | H107.3                 | 117                  | 148                                       | 0.791               |
|              |                   | H110.2                 | 4                    | 232                                       | 0.017               |
|              |                   | H112.2                 | 111                  | 133                                       | 0.834               |
|              |                   | H114.2                 | 2                    | 148                                       | 0.014               |
| 9            | MTn transposition | H3.3                   | 387                  | 432                                       | 0.896               |
|              |                   | H54.1                  | 87                   | 111                                       | 0.785               |
|              |                   | H95.1                  | 134                  | 163                                       | 0.824               |
| 10           | MTn excision      | H34.1                  | 0                    | 222                                       | 0.000               |
|              |                   | H40.1                  | 0                    | 127                                       | 0.000               |
|              |                   | H70.1                  |                      |                                           | NT                  |
|              |                   | H77.3                  | 3                    | 201                                       | 0.015               |
|              |                   | H85.1                  | 0                    | 158                                       | 0.000               |
|              |                   | H90.1                  | 0                    | 137                                       | 0.000               |
|              |                   | H90.2                  | 0                    | 106                                       | 0.000               |

1 Adjusted for reduced transmission of *sh-bz-X2* homolog

**Supplemental Table 2.** BFB activity of *bz-s* derivatives from *bz-m2(D2) Ac6067*

| <b>Class</b> | <b>Category</b>                 | <b>bz-s derivative</b> | <b># BFB kernels</b> | <b>Adjusted Total kernels<sup>1</sup></b> | <b>BFB Fraction</b> |
|--------------|---------------------------------|------------------------|----------------------|-------------------------------------------|---------------------|
| 11           | ITS rearrangement               | H57.3                  | 106                  | 145                                       | 0.733               |
|              |                                 | H72.3                  | 85                   | 106                                       | 0.805               |
|              |                                 | H75.1                  | 64                   | 206                                       | 0.311               |
|              |                                 | H87.1                  | 215                  | 238                                       | 0.905               |
| 12           | Tn recombination to <i>Ac</i>   | H54.2                  | 10                   | 211                                       | 0.047               |
|              |                                 | H77.2                  |                      |                                           | NT                  |
|              |                                 | H77.4                  | 0                    | 48                                        | 0.000               |
|              |                                 | H81.3                  | 10                   | 162                                       | 0.062               |
|              |                                 | H82.1                  | 4                    | 148                                       | 0.027               |
| 13           | Tn recombination to <i>Ds</i>   | H57.1                  | 0                    | 158                                       | 0.000               |
|              |                                 | H80.1                  | 0                    | 169                                       | 0.000               |
|              |                                 | H77.7                  |                      |                                           | NT                  |
|              |                                 | H112.3                 | 1                    | 264                                       | 0.004               |
|              |                                 | H112.4                 | 0                    | 211                                       | 0.000               |
| 14           | 3-ended <i>Ds</i> (two 3' ends) | H81.1                  | 0                    | 148                                       | 0.000               |

<sup>1</sup> Adjusted for reduced transmission of *sh-bz-X2* homolog

**Supplemental Table 3.** Primers for dicentric bridge PCR amplification

|          | Nested PCR primers |                           | 1st round PCR primers |                             |
|----------|--------------------|---------------------------|-----------------------|-----------------------------|
| Fixed    | bz-a               | ATTGCGCGCGGGTTTGATGA      | bz-y3                 | GCGACCAGGGTGCGTTGGATT       |
|          | Ac-3               | GTGTGCTCCAGATTTATATGGA    |                       |                             |
| Variable | mkk-C              | AGCGAATCTGGAATGCGAATGGA   | mkk-A                 | AGCGGCAGTGGGGAGGAGAAGAAT    |
|          | mkk-D              | AATCCGACCTGCCTTTCTTA      | mkk-C                 | AGCGAATCTGGAATGCGAATGGA     |
|          | stk-P              | AAGAGGGGATGGCTGAAGGATGAT  | stk-O                 | TTGGCTGCGGGGACACATTCTCGT    |
|          | stk-Q              | CTTCATGTCCACACCGCCGTC AAC | stk-P                 | AAGAGGGGATGGCTGAAGGATGAT    |
|          | stk-4              | AACAGGTACACGGCAATGGCAGAG  | Del-7                 | ACCCGATGGAGGAGATTTGATTAG    |
|          | stk-C              | ACTCCGGGTCGATGTAGCAGA     | Ins1                  | CGGGCACGGCCGGGTCCAG         |
|          | stk-H              | CGTCGGGCCGGAGCACCTTGAT    | stk-G                 | GCAGCTCAGCACCTCCACCTC       |
|          | stkF1              | GGCGGCCGGTGCTGCTGACAAA    | stkF-2                | GCCGAGGGAGCAGAAGGAAGAGC     |
|          | stkP-1             | GCGGCGTACGTGATTGCTCCTCCTA | Del-1                 | TGCGGGTCCGTCCGGCTGCTTGAA    |
|          | bz-N               | CACGCTCTCGTTCCTCTCCA      | bz-y5                 | GGGTGTGTCCAGAATGTACCTA      |
|          | bz-y3              | GCGACCAGGGTGCGTTGGATT     | bz-N                  | CACGCTCTCGTTCCTCTCCA        |
|          | bz-a               | ATTGCGCGCGGGTTTGATGA      | bz-y3                 | GCGACCAGGGTGCGTTGGATT       |
|          | bz-y10             | TGCAGGAAGAACTTCGACA       | by-y15                | GCGAGGACTCGTGGCCGCA         |
|          | bz-y14             | GCAATTTGTGTACGCGTCA       | stc-R1                | CACAACCATGCATGGGGCATCACAAAC |
|          | stc1-proR2         | CCTTCTGAAGGGACGACGTGG     | stc1-a                | AGCGCAAGATTAACGAGTCCAGA     |
|          | LhAcF1             | CCTGCTGGTGCAACCAAT        | LHAcF2                | ACGGTGGCACTAGCAGAGA         |
